# Supplementary material for: TRAIL-Dependent Resolution of Pulmonary Fibrosis
Source: Mediators Inflamm. 2018 Jan 24;2018:7934362. doi: 10.1155/2018/7934362 (PMC5833466; doi:10.1155/2018/7934362)
Supplement: Supplementary 1 — Figure S1: expression of apoptotic mediators in diagnostic IPF lung biopsies and end-stage IPF lung explants. Publicly available gene expression datasets (GSE24206) were mined from NCBI's geo datasets database. Gene expression values were extracted for IPF lung biopsies versus normal lungs (left) and IPF lung explants versus normal lungs (right) using NCBI's Geo2R gene expression analysis tool, and the expression data were uploaded onto ingenuity IPA. Shown is a modified version of Ingenuity's Apoptosis canonical pathway, overlaid with the GSE24206 gene expression fold changes (bottom) and P values (top). Red—upregulated transcripts by ≥1.5-fold and a P value ≤ 0.05; green—downregulated transcripts by ≥1.5-fold and a P value ≤ 0.05. [file 7934362.f1.zip]

Archive with 2 entries (2 files):
- 7934362.f1/Fig S1a_MI_2085399.jpg
- 7934362.f1/Fig S1b_MI_2085400.jpg
