# Supplementary material for: TRAIL-Dependent Resolution of Pulmonary Fibrosis
Source: Mediators Inflamm. 2018 Jan 24;2018:7934362. doi: 10.1155/2018/7934362 (PMC5833466; doi:10.1155/2018/7934362)
Supplement: Supplementary 2 — Figure S2: expression of apoptotic mediators in microdissected IPF epithelial cells and fibroblastic foci. Publicly available gene expression datasets (GSE35309) were mined from NCBI's geo datasets database. Gene expression values were extracted for hyperplastic epithelial cells adjacent to fibroblastic foci versus normal tissue (left) and fibroblastic foci versus normal lung tissue (right) using NCBI's Geo2R gene expression analysis tool, and the expression data were uploaded onto ingenuity IPA. Shown is a modified version of Ingenuity's Apoptosis canonical pathway, overlaid with the GSE35309 gene expression fold changes (bottom) and P values (top). Red—upregulated transcripts by ≥1.5-fold and a P value ≤ 0.05; green—downregulated transcripts by ≥1.5-fold and a P value ≤ 0.05. [file 7934362.f2.zip]

Archive with 2 entries (2 files):
- 7934362.f2/Fig S2a_MI_2085401.jpg
- 7934362.f2/Fig S2b_MI_2085402.jpg
