# Supplementary material for: TRAIL-Dependent Resolution of Pulmonary Fibrosis
Source: Mediators Inflamm. 2018 Jan 24;2018:7934362. doi: 10.1155/2018/7934362 (PMC5833466; doi:10.1155/2018/7934362)
Supplement: Supplementary 3 — Figure S3: expression of apoptotic mediators in IPF BAL cells. Publicly available gene expression datasets (GSE70867) were mined from NCBI's geo datasets database. Gene expression values were extracted for IPF BAL Siena cohort (A) and Freiburg cohort (B) versus normal donor BAL using NCBI's Geo2R gene expression analysis tool, and the expression data were uploaded onto ingenuity IPA. Shown is a modified version of Ingenuity's Apoptosis canonical pathway, overlaid with the GSE70867 gene expression fold changes (bottom) and P values (top). Red—upregulated transcripts by ≥1.5-fold and a P value ≤ 0.05; green—downregulated transcripts by ≥1.5-fold and a P value ≤ 0.05. [file 7934362.f3.zip]

Archive with 2 entries (2 files):
- 7934362.f3/Fig S3a_MI_2085403.jpg
- 7934362.f3/Fig S3b_MI_2085404.jpg
